1 **Full Title:** Engagement of health workers and peer educators from the National Adolescent  
2 Health Programme-Rashtriya Kishor Swasthya Karyakram during the COVID-19 pandemic:  
3 findings from a situational analysis

4 **Short Title:** Health workers and Peer Educators engagement during COVID-19

5 **Authors:** Monika Arora<sup>1\*</sup>, Stefanie Dringus<sup>2</sup>, Deepika Bahl<sup>1</sup>, Zoya Rizvi<sup>4</sup>, Heeya Maity<sup>1</sup>,  
6 Smritima Lama<sup>1</sup>, Amanda J. Mason-Jones<sup>3</sup>, Deepak Kumar<sup>4</sup>, Prairna Koul<sup>4</sup>, Shalini Bassi<sup>1</sup>

7 **Affiliations:**

8 <sup>1</sup>Health Promotion Division, Public Health Foundation of India, Gurugram, Haryana, India

9 <sup>2</sup>Independent Global Health Consultant, Yeate Street, London, England

10 <sup>3</sup>Department of Health Sciences, University of York, Heslington, York, England

11 <sup>4</sup>Ministry of Health and Family Welfare, Government of India, India

12 **\*Corresponding author:**

13 Dr. Monika Arora

14 Email: [monika.arora@phfi.org](mailto:monika.arora@phfi.org)

## 15 **Abstract**

## 16 **Background**

17 To understand the impact of COVID-19 on implementation of the peer education programme  
18 of the National Adolescent Health Programme-Rashtriya Kishor Swasthya Karyakram;  
19 repurposing of the RKSK health workers and Peer Educators (PE) in COVID-19 response  
20 activities and; adolescents' health and development issues.

## 21 **Methods**

22 Virtual in-depth interviews were conducted with stakeholders (n=31) (aged 15 to 54) engaged  
23 in the implementation of the peer education programme at state, district, block, and village  
24 levels in Madhya Pradesh and Maharashtra (India). These interviews were thematically coded  
25 and analysed to address the research objectives.

## 26 **Results**

27 Despite most peer education programme activities being stopped, delayed, or disrupted during  
28 the pandemic and subsequent lockdown, some communication networks previously  
29 established, helped facilitate public health communication regarding COVID-19 and RKSK,  
30 between health workers, peer educators, and adolescents. There was significant repurposing of  
31 RKSK health workers and Peer Educators' role towards COVID-19 response-related activities.  
32 Peer educators, with support from health workers, were involved in disseminating COVID-19  
33 information, maintaining migrant and quarantine records, conducting household surveys for  
34 finding COVID-19 active cases and providing essential items (grocery, sanitary napkins, etc.)  
35 to communities and adolescents.

## 36 **Conclusion**

37 Peer Educators with support from community health workers are able to play a crucial role in  
38 meeting the needs of the communities during a pandemic. There is a need to further engage,  
39 involve and build the skills of Peer Educators to support the health system. PEs can be  
40 encouraged by granting more visibility and incorporating their role more formally by paying  
41 them within the public health system in India.

## 42 **Introduction**

43 The COVID-19 pandemic has presented numerous challenges to health systems globally(1).  
44 India has implemented control measures similar to other countries to curtail the spread of  
45 COVID-19. This led to decision-makers making difficult choices, which involved prioritising  
46 preventive and curative COVID-19-related care while scaling back other areas of healthcare  
47 delivery, including but not limited to, adolescent health(2). The central and state government  
48 continue implementing preventive public health measures (3,4) including lockdowns, closure  
49 of educational institutions (schools, colleges), physical distancing, compulsory wearing of a  
50 mask, and restrictions on large gatherings and social events (deaths and marriages).

51 However, the pandemic has also had severe direct and indirect consequences on the health  
52 outcomes of people and the health system functioning during India's first lockdown (March-  
53 May, 2020). Health care services were disrupted for non-COVID patient care due to the closure  
54 of routine outpatient departments, immunization clinics, antenatal services(5), and hospitals  
55 being designated as COVID-19 treatment centers(6). Data from National Health Mission  
56 highlighted a reduction in availing medical treatment (including both inpatients and  
57 outpatients) and emergencies for both infectious and non-communicable diseases (NCDs)(7)  
58 during the lockdown.

59 Implementation of several national health programmes, including India's National Adolescent  
60 Health Programme-Rashtriya Kishor Swasthya Karyakram (NAHP-RKSK), were impacted  
61 during COVID-19. RKSK was launched across India in 2014, aiming to reach all adolescents,

62 including both males and females, rural and urban, married and unmarried, and those in and  
 63 out of school. RKSK encompasses various interventions involving multiple implementation  
 64 stakeholders (Table 1). Interventions specified in Table 1 operate at school, community, and  
 65 health facilities' levels. The peer education programme, one of the core interventions under  
 66 RKSK, is expected to increase adolescents' engagement with health services and improve their  
 67 knowledge, attitudes, and life skills in six thematic areas- mental health, injuries, and violence,  
 68 sexual and reproductive health, NCDs, substance misuse, and nutrition.

69 **Table 1: Overview of RKSK interventions and health workers (8,9) involved in programme**  
 70 **implementation**

71

| Activities/<br>Services                               | Service Delivery                                                                                                                                                                                                                                                                                                                                                                                                                                                                                                                                                                                  | RKSK Stakeholders                                                                                                                                                                        |
|-------------------------------------------------------|---------------------------------------------------------------------------------------------------------------------------------------------------------------------------------------------------------------------------------------------------------------------------------------------------------------------------------------------------------------------------------------------------------------------------------------------------------------------------------------------------------------------------------------------------------------------------------------------------|------------------------------------------------------------------------------------------------------------------------------------------------------------------------------------------|
| <b>1. Facility-Based Intervention</b>                 |                                                                                                                                                                                                                                                                                                                                                                                                                                                                                                                                                                                                   |                                                                                                                                                                                          |
| AFHC<br>(Adolescent<br>Friendly<br>Health<br>Clinic)  | It is a dedicated room for adolescents with the provision of clinical, counselling, and referral services. Commodities (Iron Folic Acid tablets and other medicines, pregnancy testing kits, sanitary napkins & contraceptives) are also disbursed to adolescents. AFHCs are operational at Primary Health Centers (PHCs), Community Health Centers (CHCs), and District Hospitals (DHs). AFHC at the DH level will be developed as Adolescent Friendly Health Resource Centre (AFHRC) responsible for capacity building of health care providers and act as a repository for RKSK IEC materials. | Medical Officers, RKSK counsellors, Auxiliary Nurse Midwives (ANM)                                                                                                                       |
| <b>2. Community-Based Interventions</b>               |                                                                                                                                                                                                                                                                                                                                                                                                                                                                                                                                                                                                   |                                                                                                                                                                                          |
| Adolescent<br>Health &<br>Wellness<br>Days<br>(AHWDs) | To improve the coverage with the preventive and promotive interventions and to increase awareness among adolescents, parents, families, and other community stakeholders. AHWD is organized quarterly at the village level.                                                                                                                                                                                                                                                                                                                                                                       | Accredited Social Health Activist (ASHA), ASHA Facilitators, Anganwadi worker (AWW), PEs, ANM, MOs, Non-Governmental Organization (NGO) Trainer/Mentor and Adolescent Health counsellors |

|                                                                                            |                                                                                                                                                                                                                                                                                                                                                                                                                                                  |                                                                                                                                                                                                                                |
|--------------------------------------------------------------------------------------------|--------------------------------------------------------------------------------------------------------------------------------------------------------------------------------------------------------------------------------------------------------------------------------------------------------------------------------------------------------------------------------------------------------------------------------------------------|--------------------------------------------------------------------------------------------------------------------------------------------------------------------------------------------------------------------------------|
| Adolescent Friendly Club (AFC)                                                             | Meetings are organized once a month at the sub-centre (village level) under the guidance of ANM. Cover 5 villages/5000 population. Thus, there are 10-20 PEs from different villages are present in these meetings. PEs from different villages meet and clarify issues faced during their village-level PE sessions.                                                                                                                            | ANM, ASHA, ASHA Facilitators, PEs                                                                                                                                                                                              |
| Peer Education Programme                                                                   | 2 PEs (one boy and one girl) were selected per village/1000population/ASHA habitation to reach out to adolescents. Each PE forms a group of 15-20 boys or girls from the community and conducts weekly 1-2 hour participatory sessions using PE kits.                                                                                                                                                                                            | PEs, ASHA, ASHA facilitator, ANM, NGO mentor/ trainer                                                                                                                                                                          |
| Weekly Iron Folic Supplementation (WIFS)                                                   | Screening of anaemia among girls and serving out-of-school adolescent girls in Anganwadi centres on a fixed day in a week to provide IFA tablets. Biannually Albendazole is provided for deworming                                                                                                                                                                                                                                               | ANM, ASHA, AWW                                                                                                                                                                                                                 |
| Menstrual Hygiene Scheme (MHS)                                                             | Girls are provided with knowledge and information regarding good menstrual hygiene and the safe disposal of sanitary napkins. ASHAs provide napkins at a subsidized rate of Rs. 6 per pack of 6 napkins to adolescent girls in schools and communities.                                                                                                                                                                                          | ASHAs                                                                                                                                                                                                                          |
| <b>3. School (government, government-aided municipal schools) based (10) interventions</b> |                                                                                                                                                                                                                                                                                                                                                                                                                                                  |                                                                                                                                                                                                                                |
| School Health programme under Ayushman Bharat                                              | The Government of India, under the Health and Wellness component of the Ayushman Bharat (Healthy India) Programme, intensified school-based health activities. These activities combine health education, promotion, disease prevention, and improved access to the health system at the school level.<br>Two PEs/Saathiya, one boy and one girl may support the health and wellness ambassador in carrying out the health promotion activities. | Trained School Teachers (Health & Wellness Ambassadors), Health and wellness messengers (2 students per section assist the health ambassadors), ANM, ASHA, AWW, Counsellors (school outreach), PEs (in-school & out of school) |
| Menstrual Hygiene Scheme (MHS)                                                             | Health education for adolescent girls and providing sanitary napkins and enabling other sanitation measures such as access to water and toilets in schools. Provide life skill courses to adolescents of class IX and XI                                                                                                                                                                                                                         | School teachers                                                                                                                                                                                                                |
| Weekly Iron Folic Acid Supplementation Programme                                           | Screening of Anaemia among adolescents and provide weekly IFA tablets to adolescents boys and girls and Albendazole biannually for deworming                                                                                                                                                                                                                                                                                                     | School teachers                                                                                                                                                                                                                |

72 Our research team initiated a study to explore the implementation of the peer education  
73 programme of RKSK in two Indian states (Madhya Pradesh and Maharashtra) in 2020. As part  
74 of this study, a situational analysis was conducted virtually, to examine the impact of COVID-  
75 19 on a) peer education programme implementation, b) repurposing of the RKSK health  
76 workers and PEs i.e. *in addition to their existing roles and responsibilities under the RKSK,*  
77 *their participation in COVID-19 response activities,* c) adolescents' health and development  
78 issues.

## 79 **Materials and Methods**

### 80 **Study setting and participants**

81 The study was conducted in Madhya Pradesh and Maharashtra. Madhya Pradesh is a large state  
82 in central India with a population of 72.6 million and a literacy rate of 69.3%. Maharashtra, in  
83 India's western peninsular region, is the second-most populous state with a population of 112.3  
84 million and an 82.3% literacy rate(11). Both states were among the most severely affected  
85 states in India due to COVID-19(12,13). This trend remained from the start of the pandemic to  
86 its waning phase, with Maharashtra reporting an increasing number of cases despite the  
87 national lockdown(14). Madhya Pradesh, one month into the pandemic, remained among the  
88 top five most impacted states with the highest number of fatalities(15). In consultation with  
89 state health departments, two districts were chosen from each state, i.e., Panna and Damoh  
90 from Madhya Pradesh and in Maharashtra, Nashik, and Yavatmal, to include in the study.  
91 Study participants were recruited using a snowball sampling approach wherein the state RKSK  
92 team nominated participants from the district who then nominated participants from the block  
93 and further participants at the village level. Participants who provided their consent were  
94 included in the study.

### 95 **Data Collection**

96 Data was collected through in-depth interviews (IDIs), using semi-structured interview guides  
97 tailored for each group of participants. These in-depth interview guides were developed  
98 referring to RSKS Implementation Guidelines(8), Operational Framework(16), and  
99 consultations with the Central, State, and District RSKS officials. An overview of respondents  
100 interviewed and themes covered has been presented in table S1. These IDIs were conducted in  
101 Madhya Pradesh (during June-November, 2020) and Maharashtra (during August-November  
102 2020). IDIs were moderated by trained qualitative researchers accompanied by a note taker. To  
103 mitigate the risk of COVID-19 transmission, virtual audio interviews using the Zoom platform  
104 and mobile phones were conducted. Most officials at the district level were interviewed on  
105 Zoom while those at the village level were interviewed over the mobile phone considering the  
106 technology empowerment. The average duration of each interview was 60-90 minutes. Verbal  
107 consent was obtained from each participant as per the Indian Council of Medical Research's  
108 revised guidelines during the COVID-19 pandemic (17). Interviews were conducted in English  
109 or Hindi, audio-recorded, translated, and transcribed. Ethics approval for the research was  
110 obtained from the Institutional Ethics Committee of the Public Health Foundation of India  
111 (Reference # TRC-IEC-342.1/17).

## 112 **Data Analysis**

113 Each transcript was read several times by two authors independently, data were coded and  
114 organised thematically. Discrepancies between two authors in coding and organising data were  
115 discussed with a third senior author. In the end, three major and two sub-themes were generated  
116 to address the research objectives and these have been discussed in the results section.

## 117 **Results**

### 118 **Demographic profile of study participants**

119 In total, thirty-one participants were interviewed from both study states representing the RKSK  
 120 at state, district, block, and village levels (Table 2). There were 18 participants from Madhya  
 121 Pradesh and 13 from Maharashtra. The difference in the number of participants recruited by  
 122 hierarchy (state, district, block, and village) and by states has been attributed to the nominations  
 123 provided by the contact person at a higher level (state and district). The participants' ages  
 124 ranged from 15 to 54 years and the affiliation period with RKSK ranged from 1 month to 5  
 125 years while the median affiliation period was 2 years (24 months).

126 **Table 2: Study participants & their roles and responsibilities (N=31)**

127

|               | <b>RKSK health workers</b> | <b>Roles &amp; Responsibilities</b>                                                                                                                                                                                                                                                                                                                                                                                                  | <b>State</b> | <b>No. of Participants (N)</b> | <b>Participant Gender (Male/Female)</b> |
|---------------|----------------------------|--------------------------------------------------------------------------------------------------------------------------------------------------------------------------------------------------------------------------------------------------------------------------------------------------------------------------------------------------------------------------------------------------------------------------------------|--------------|--------------------------------|-----------------------------------------|
| <b>S. No.</b> | <b>State Level</b>         |                                                                                                                                                                                                                                                                                                                                                                                                                                      |              |                                |                                         |
| 1.            | State Nodal Officer        | <ul style="list-style-type: none"> <li>Act as focal point person for adolescent health programme in the State.</li> <li>Responsible for implementation of RKSK at State/District Level.</li> <li>Advocate for the importance of adolescent health at State</li> <li>Coordination with all stakeholders to ensure appropriate implementation of the programme.</li> <li>Prepare adolescent Health Programme Implementation</li> </ul> | Maharashtra  | 1                              | M                                       |



|                       |                                                |                                                                                                                                                                                                                                                                                                                                                                                                                                                                         |                |   |   |
|-----------------------|------------------------------------------------|-------------------------------------------------------------------------------------------------------------------------------------------------------------------------------------------------------------------------------------------------------------------------------------------------------------------------------------------------------------------------------------------------------------------------------------------------------------------------|----------------|---|---|
|                       |                                                | <p>Plan (PIP) for the State</p> <ul style="list-style-type: none"> <li>• Publicity of adolescent health issues at different platforms using IEC, mass media, mid media, etc.</li> <li>• Consolidate, review and submit the Adolescent Health Progress report every quarter to the Mission Director and further on to the Government of India</li> <li>• Engage in regular monitoring and supportive supervision of progress of Adolescent Health Programmes.</li> </ul> |                |   |   |
| <b>District Level</b> |                                                |                                                                                                                                                                                                                                                                                                                                                                                                                                                                         |                |   |   |
| 2.                    | Programme Manager /Chief Medical Officer (CMO) | <ul style="list-style-type: none"> <li>• District CMO appoints officer to supervise, monitor, and report the implementation of RSKK</li> <li>• Supervises, monitors, compiles, and reports on the activities of RSKK and NGO wherever applicable.</li> </ul>                                                                                                                                                                                                            | Madhya Pradesh | 1 | M |
| 3.                    | Community Mobilizer                            | <ul style="list-style-type: none"> <li>• Supervises and monitors the ASHAs and ASHA Facilitators of the district for all</li> </ul>                                                                                                                                                                                                                                                                                                                                     | Madhya Pradesh | 1 | M |

|    |                                                      |                                                                                                                                                                                                                                                                                                                                                      |                |   |   |
|----|------------------------------------------------------|------------------------------------------------------------------------------------------------------------------------------------------------------------------------------------------------------------------------------------------------------------------------------------------------------------------------------------------------------|----------------|---|---|
|    |                                                      | programs including RKSK components                                                                                                                                                                                                                                                                                                                   |                |   |   |
| 4. | Programme Coordinator                                | <ul style="list-style-type: none"> <li>State government appointee and oversees RKSK implementation</li> </ul>                                                                                                                                                                                                                                        | Madhya Pradesh | 1 | M |
| 5. | District Reproductive and Child Health (RCH) Officer | <ul style="list-style-type: none"> <li>Master Trainer of MOs, ANMs, ASHAs, PEs, and Lady Health Visitors</li> <li>Monthly review of counsellor for monitoring the PE district improvement</li> <li>Monitoring and evaluation of the programme</li> </ul>                                                                                             | Maharashtra    | 1 | M |
| 6. | District RKSK Counsellors                            | <ul style="list-style-type: none"> <li>Dual responsibility of providing clinical and counselling services at Maitri clinic and District Hospital</li> <li>Coordinates community and school-based outreach activities</li> <li>Identifies and addresses the needs of adolescents to ensure support</li> <li>Record Keeping &amp; Reporting</li> </ul> | Maharashtra    | 2 | F |
| 7. | Counsellor at District Hospital                      | <ul style="list-style-type: none"> <li>Provides clinical and counselling services</li> <li>Coordinates community and school-based outreach activities</li> </ul>                                                                                                                                                                                     | Madhya Pradesh | 1 | M |

|                    |                                               |                                                                                                                                                                                                                                                                                                                                                                                                                                                                                                                                    |                |   |   |
|--------------------|-----------------------------------------------|------------------------------------------------------------------------------------------------------------------------------------------------------------------------------------------------------------------------------------------------------------------------------------------------------------------------------------------------------------------------------------------------------------------------------------------------------------------------------------------------------------------------------------|----------------|---|---|
| 8.                 | Training Faculty<br>(Faculty Training Centre) | <ul style="list-style-type: none"> <li>• Monitor implementation of annual training plan monthly</li> <li>• Conduct Training Visit according to the training plan and provide qualitative input.</li> <li>• Coordinates and plans activities at the training centre</li> <li>• Develop training plans and conducts training of trainers (MOs &amp; other paramedical staff) according to the training plan</li> <li>• Evaluation and feedback of the training conducted and gives input where necessary for improvement.</li> </ul> | Maharashtra    | 1 | F |
| 9.                 | NGO Representative                            | <ul style="list-style-type: none"> <li>• NGO responsible for the recruitment of staff to support village and AFC level activities</li> <li>• Report on activities and progress to District Nodal Officer</li> </ul>                                                                                                                                                                                                                                                                                                                | Madhya Pradesh | 1 | M |
| <b>Block Level</b> |                                               |                                                                                                                                                                                                                                                                                                                                                                                                                                                                                                                                    |                |   |   |
| 10.                | Medical Officer<br>(Primary Health Centre)    | <ul style="list-style-type: none"> <li>• Dual responsibility of Medical Officer at PHC and counsellor at AFHC in PHC as RKSK coordinator for the block</li> </ul>                                                                                                                                                                                                                                                                                                                                                                  | Maharashtra    | 1 | F |

|                      |                   |                                                                                                                                                                                                                                                                                                                                                                                                                  |                |   |   |
|----------------------|-------------------|------------------------------------------------------------------------------------------------------------------------------------------------------------------------------------------------------------------------------------------------------------------------------------------------------------------------------------------------------------------------------------------------------------------|----------------|---|---|
|                      |                   | <ul style="list-style-type: none"> <li>• Monitor AHD &amp; AFC activities</li> </ul>                                                                                                                                                                                                                                                                                                                             |                |   |   |
| 11.                  | RKSK Counsellor   | <ul style="list-style-type: none"> <li>• Counsellor at AFHC in CHC</li> <li>• Provides counselling to adolescents on six themes of RKSK</li> <li>• Supports district RKSK nodal officer to organize RKSK activities in their catchment area</li> </ul>                                                                                                                                                           | Madhya Pradesh | 1 | F |
| <b>Village Level</b> |                   |                                                                                                                                                                                                                                                                                                                                                                                                                  |                |   |   |
| 12.                  | ANMs              | <ul style="list-style-type: none"> <li>• Moderates monthly Adolescent Friendly club meetings/sessions</li> <li>• Providing counselling services at PHC</li> <li>• Helps disburse non-financial incentives to PEs</li> <li>• Organizes AHWD and provides group/individual sessions with parents on adolescent health needs</li> <li>• Submits monthly progress report to PHC medical officer in charge</li> </ul> | Maharashtra    | 2 | F |
| 13.                  | ASHA Facilitators | <ul style="list-style-type: none"> <li>• Supervises up to 10-12 ASHAs</li> <li>• Attends at least one PE session per month to resolve issues raised by ASHAs/PEs</li> <li>• Collects and consolidates PE</li> </ul>                                                                                                                                                                                              | Madhya Pradesh | 2 | F |

|     |                        |                                                                                                                                                                                                                                                                                                                                                                                                                                                                                                                                                                                               |                |   |   |
|-----|------------------------|-----------------------------------------------------------------------------------------------------------------------------------------------------------------------------------------------------------------------------------------------------------------------------------------------------------------------------------------------------------------------------------------------------------------------------------------------------------------------------------------------------------------------------------------------------------------------------------------------|----------------|---|---|
|     |                        | monthly reports (collected by ASHAs)                                                                                                                                                                                                                                                                                                                                                                                                                                                                                                                                                          |                |   |   |
| 14. | ASHAs                  | <ul style="list-style-type: none"> <li>Helps select &amp; recruit PEs in consultation with community leaders, parents, and NGO trainer-cum-mentor (where applicable)</li> <li>Supportive supervision of PEs (help from groups, unresolved queries from PE sessions, etc.)</li> <li>First point of contact for resolving issues faced by PEs</li> <li>Attends PE sessions organized at village level</li> <li>Collects and consolidates PE monthly reports</li> <li>Helps organize, mobilize adolescents and other stakeholders to attend AHWD</li> <li>Refers adolescents to AFHCs</li> </ul> | Maharashtra    | 2 | F |
|     |                        |                                                                                                                                                                                                                                                                                                                                                                                                                                                                                                                                                                                               | Madhya Pradesh | 5 | F |
| 15. | NGO Mentor cum Trainer | <ul style="list-style-type: none"> <li>In states with NGO-led implementation models, they are appointed by NGOs</li> <li>Helps in selection and recruitment of PEs along with ASHAs</li> </ul>                                                                                                                                                                                                                                                                                                                                                                                                | Madhya Pradesh | 1 | M |

|     |                  |                                                                                                                                                                                                                                                                                                                                                                                                                 |                |   |   |
|-----|------------------|-----------------------------------------------------------------------------------------------------------------------------------------------------------------------------------------------------------------------------------------------------------------------------------------------------------------------------------------------------------------------------------------------------------------|----------------|---|---|
|     |                  | <ul style="list-style-type: none"> <li>Provides supportive supervision to PEs</li> <li>Trains and distributes kits to PEs</li> <li>Facilitates AFC meetings</li> </ul>                                                                                                                                                                                                                                          |                |   |   |
| 16. | Anganwadi Worker | <ul style="list-style-type: none"> <li>Maintains Anganwadi Centre sometimes used for RKSK activities</li> <li>Mainly engaged in WIFS component of RKSK services</li> <li>Helps in organizing AHWD and mobilizing community participation</li> </ul>                                                                                                                                                             | Madhya Pradesh | 1 | F |
| 17. | PEs              | <ul style="list-style-type: none"> <li>Conducts sessions with adolescents to build their knowledge, attitude, and skills on the six RKSK themes</li> <li>Forms adolescent groups (brigade)</li> <li>Provides referrals for AFHCs and/or counselling</li> <li>Participate in the Adolescent Friendly Club meetings</li> <li>Actively participate in Adolescent Health &amp; wellness Days (AH&amp;WD)</li> </ul> | Maharashtra    | 1 | M |
|     |                  |                                                                                                                                                                                                                                                                                                                                                                                                                 |                | 2 | F |
|     |                  |                                                                                                                                                                                                                                                                                                                                                                                                                 |                | 2 | M |
|     |                  |                                                                                                                                                                                                                                                                                                                                                                                                                 | Madhya Pradesh | 1 | F |

|  |  |                                                                                                                                                        |  |  |  |
|--|--|--------------------------------------------------------------------------------------------------------------------------------------------------------|--|--|--|
|  |  | <ul style="list-style-type: none"><li>• Maintains PE diary in the prescribed format</li><li>• Prepares monthly composite PE sessions' report</li></ul> |  |  |  |
|--|--|--------------------------------------------------------------------------------------------------------------------------------------------------------|--|--|--|

128

129 Key findings from this situational analysis are described under the following themes and sub-  
130 themes: 1) implementation of Peer Education programme during COVID-19; a) connectivity  
131 between RSKK health workers and PEs and between PEs and adolescents; b) impact of  
132 COVID-19 on Adolescent Friendly Health Services (AFHCs) and helplines, and;2)  
133 repurposing of the RSKK health workers and PEs; 3) adolescents' health and development  
134 issues during COVID-19.

### 135 **Implementation of Peer Education programme**

136 In the face of the pandemic, all activities related to the Peer Education programme  
137 implementation were either on hold, significantly delayed, or altered. Disruptions in the  
138 programme implementation were due to the restrictions put in place due to COVID-19  
139 (lockdown, physical distancing, restricted movements, etc.) The stalled activities ranged from  
140 signing contracts with Non-Governmental Organisations (NGOs) to implement programme  
141 activities such as Adolescent Friendly Club (AFC) meetings, recruitment and training of PEs,  
142 delivery of PE sessions, and community outreach activities such as Adolescent Health and  
143 Wellness Days (AHWDs), school outreach activities. The District Coordinator from Madhya  
144 Pradesh said "*due to COVID-19, the entire programme has been on pause, otherwise we would*  
145 *have received the copy of the agreement (between the state government and NGO) by now and*  
146 *started the work including staff selection. Due to a rise in the number of COVID-19 cases, we*  
147 *have PE training on hold*". The District Reproductive and Child Health (RCH) officer in  
148 Maharashtra explained, "*we conduct outreach programmes in 5-6 schools every month but this*  
149 *year due to COVID-19, we haven't been able to do it*".

150 **Connectivity between RKSK health workers and PEs, and between PEs and**  
151 **adolescents during COVID-19 lockdown**

152 Participants shared that PE sessions and information dissemination via in-person methods at  
153 the village level were put on hold due to COVID-19 restrictions. However, some  
154 communication, through mobile phones (via calls, WhatsApp, videos/ films) with PEs, related  
155 to COVID-19 and peer education programmes existed during the lockdown. Pre-existing  
156 WhatsApp groups for RKSK related activities, between Accredited Social Health Activists  
157 (ASHAs) and PEs, were used for this communication. This informal and unplanned  
158 communication was evidence of the pivot, from the original guidelines (18) and shift from PE  
159 programme implementation pre-COVID to accommodate needs emerging due to COVID  
160 context. This information was further shared with friends, family, and other adolescents.

161 *We are giving information to PEs through WhatsApp only. All information given is*  
162 *related to coronavirus, like what precautions they should take, hand washing, wearing*  
163 *a mask when going out, cleaning used masks, maintaining a distance of at least 6*  
164 *feet. (ASHA, Madhya Pradesh)*

165 In-person interaction with adolescents continued to occur during home visits by ASHAs and  
166 ASHA facilitators as part of the Weekly Iron Folic Acid Supplementation (WIFS) programme  
167 or other maternal and child health programmes.

168 Additionally, an NGO representative described how a trainer-cum-mentor, responsible for  
169 providing supportive supervision to PEs, had kept in touch with some PEs in Madhya Pradesh.  
170 He said, “*one mentor is in touch with 20 PEs through telephone. Since they (PEs) stay in the*  
171 *same village, they may talk to the adolescents one to one physically, or in small groups under*  
172 *the supervision of mentor over video call”.*

173 PE also reported sharing information about COVID-19 to other adolescents in their  
174 communities as instructed by ASHA:



175 *We meet girls in the coaching classes and we talk about wearing a mask and hand*  
176 *washing. ASHA asked us to inform others about it. (PE Female, Madhya Pradesh)*

177 Despite these successes of communication, some hindrances in the flow of information  
178 remained; for example, not all PEs could be reached via mobile phones due to lack of access.  
179 In many instances, there was sporadic and brief communication with those that were able to  
180 connect:

181 *There are some pockets in our district where there is no network. Some adolescents*  
182 *don't have their cell phones, some use their family member's phone, so they may not be*  
183 *available to talk for that long when mentor calls. (NGO Representative, Madhya*  
184 *Pradesh)*

### 185 **Impact of COVID-19 on Adolescent Health Services (AFHCs and Helpline)**

186 In both states, participants reported adverse impacts on the delivery of health services,  
187 including AFHCs. During the initial lockdown period, AFHCs at Community Health Centres  
188 in Madhya Pradesh remained closed with no tele-counselling provision. At this time,  
189 counsellors were involved in other COVID-19 related duties. As reported by an AFHC  
190 counsellor at a CHC in Madhya Pradesh “...the clinic is closed nowadays. We have to check  
191 migrant labourers; whether they have been screened or not for COVID-19. We collect data  
192 and send it to the concerned authorities. Nothing like that (tele-counselling etc.) is provided.”

193 The participants were also asked if there was any alternative available for adolescents such as  
194 a telephone helpline. There was a mixed response from the two study states participants. In  
195 Maharashtra, most of the participants were unaware of a helpline. A counsellor from Madhya  
196 Pradesh mentioned 1098, a 24-hour emergency outreach service helpline for children (0-18  
197 years) in distress, a service of the Ministry of Women and Child Development operating  
198 through Childline India Foundation(20,21) and an active 104-helpline before COVID-19.

199            “Calling 104 was usually an effective way for adolescents to solve their problem when  
200            they may not feel comfortable speaking to an ASHA, as stay in the same village.”  
201            *(ASHA, Madhya Pradesh)*

202    However, the counsellor from CHC expressed concern about the inability to divert calls from  
203    104, if adolescents require further or more individualised advice or medical care.

204    After the reopening of AFHCs in both states, the footfall of adolescents was reported to have  
205    decreased significantly. This decrease may have been attributed, in part, to parents’ hesitation  
206    in sending their children to clinics due to fear of COVID-19 transmission. In Maharashtra, a  
207    decline in footfall may also have reduced clinics' functional days or vice-versa.

208            “Before COVID the clinic was regular (5 days a week). These days the footfall is much  
209            lesser, only 6-7 adolescents come in a day compared to 20 adolescents in a day before  
210            the pandemic.” *(Counsellor, District Hospital, Maharashtra)*

211    Due to COVID-19 restrictions, there may also have been gender differences in those who were  
212    accessing the services in clinics. A counsellor from AFHC reported (Maharashtra), “before  
213    COVID-19 there would be 30-32 adolescents in a day and there were more female visitors than  
214    males. But there is not much difference now during COVID.”

## 215    **Repurposing of RKSK health workers and PEs to support COVID-19** 216    **response: During and post-lockdown**

217    Several respondents reported significant repurposing in terms of roles and responsibilities to  
218    support COVID-19 response-related activities during and post COVID-19 lockdown. The PEs  
219    who have been trained under RKSK adapted to the context and undertook COVID-19 response  
220    activities by disseminating COVID-19 information to community members including  
221    adolescents. With the intent of tracing and tracking, they helped maintain migration and  
222    quarantine records of people migrating from urban cities to villages, and records were  
223    submitted at the block level.

224 In Maharashtra, RKSK counsellors and counsellors of other health programs like Integrated  
225 Counselling and Testing Centers (ICTC) under the National AIDS Control Programme  
226 reported providing COVID-19 related counselling at help desks set up at out-patient  
227 departments and the in-patient department wards of District Hospitals. Similarly, from Madhya  
228 Pradesh, a counsellor from Community Health Centre (CHC) reported his involvement in  
229 checking the migrant labourers for COVID-19 symptoms.

230 *“We have to check migrant labourers; whether they have been screened or not for*  
231 *COVID-19”.* **(CHC Counsellor, Madhya Pradesh)**

232 ASHAs in Maharashtra were tasked with conducting village-level household surveys for the  
233 “My Village, My Responsibility” (19) campaign initiated by the Government of Maharashtra.  
234 The campaign aims to survey and screen households to detect COVID-19 patients and those  
235 with other pre-existing conditions (diabetes, cancer, and hypertension). A few ASHAs from  
236 Maharashtra also reported making and distributing masks using their resources (money, fabric,  
237 sewing machine) for community members at no charge. ASHA Facilitators and ASHAs were  
238 also tasked with visiting and surveying households to monitor COVID-19 active cases.

239 Without any additional formal training, PEs also contributed during COVID-19. They helped  
240 ASHAs in sensitising villagers about COVID-19 information including physical distancing,  
241 compulsory wearing of masks, sanitization, and handwashing. It was reported by the NGO  
242 trainer-cum-mentor (Madhya Pradesh) *“(PEs) are distributing masks, preparing migrant*  
243 *workers’ lists who are coming back and maintaining information about the people who are*  
244 *quarantined. PEs also helped ASHAs paint walls with information regarding COVID-19*  
245 *preventive and protective measures. This included information about social distancing, masks,*  
246 *and sanitization and handwashing.”.*

247 In Maharashtra, PEs reported helping ASHAs in putting stickers as part of the “My Village,  
248 My Responsibility” (19) campaign.

249 *As part of the My Village, My Responsibility campaign, we helped ASHA to put stickers*  
250 *outside the houses in the whole village. In that sticker, we write the number of family*  
251 *members, with their age, and if anyone has any comorbidities like diabetes, and if any*  
252 *member has a fever. (PE Male, Maharashtra)*

253 PEs also provided essential items such as grocery and menstrual hygiene products to  
254 adolescents and/or their families in the villages living in containment (*only essential activities*  
255 *allowed with strict perimeter control ensuring no movement of people*) or red zones (*areas with*  
256 *high COVID-19 caseload*).

257 *Those who were in red zones and not able to go out and buy anything. So, they call us*  
258 *(PEs) for necessities like milk, bread, and even medicines and we buy them and leave*  
259 *them outside their home. (Male PE, Maharashtra)*

## 260 **Adolescents' health and development issues during COVID-19**

261 There was limited and mixed data on the potential impact of COVID-19 on adolescents' health  
262 and development issues. Participants from both states shared that adolescents faced challenges  
263 pertaining to education due to COVID-19 related school closures.

264 *"Their online classes are happening, and a lot of children are saying we don't*  
265 *understand much in these online classes. I think in face-to-face teaching; they*  
266 *understand quickly in comparison to online classes. In our village, online study content*  
267 *is received on WhatsApp. According to adolescents, the information is so long that they*  
268 *lose interest in reading the text."* (ASHA, Madhya Pradesh)

269 Few interview participants reported that the adolescents did not face severe challenges like  
270 mental health or sexual abuse during the pandemic. PE also highlighted that mental health was  
271 the most discussed topic during PE sessions with adolescents at the village level before  
272 COVID-19.

273 *Adolescents are wearing masks and meeting their friends, so I don't think that COVID-*  
274 *19 is affecting their mental health. (ASHA, Madhya Pradesh)*

275 *The same number of cases of sexual abuse had come, both before and after COVID-19,*  
276 *only 2-4 cases came each month. (Counsellor-District Hospital, Maharashtra)*

277 *Mental health is the most discussed topic among adolescents as I think they are more*  
278 *stressed, so they like sharing that with us. (PE, Maharashtra)*

279 PEs also reported that COVID-19 appeared to have had some impact on menstrual health  
280 hygiene. Two female PEs (Maharashtra) explained, “*sanitary pads/ napkins were not easily*  
281 *available. We contacted ASHA and ASHAs provided pads to the girls who were having*  
282 *difficulties in procuring them.*” There appeared to be a lack of demand in some places even  
283 pre-COVID, as reported by NGO trainer/mentor (MP) “*they very rarely use pads in the villages.*  
284 *Our NGO used to sell pads which cost rupees 15(USD 0.20). Few bought but most said that*  
285 *they feel better using cloth.*”

## 286 **Discussion**

287 COVID-19, an unprecedented global health emergency, resulted in the disruption of healthcare  
288 delivery to people of all age groups, including adolescents. Literature suggests several  
289 consequences of COVID-19 and one of the most impacted groups would be the adolescents  
290 due to school closures, increased unemployment, etc. putting them at an increased risk of  
291 dropping out from school, gender gaps in education, mental health conditions, early marriage,  
292 smartphone addiction, etc. (1,22). To the best of our knowledge, this is the first study in India  
293 that has attempted to understand what happened to the national adolescent health programme  
294 (NAHP-RKSK) at the time of COVID-19 and how PE without any additional formal training,  
295 along with the health workers, played a crucial role in the COVID-19 response-related  
296 activities in the community of selected districts of Madhya Pradesh and Maharashtra.

## 297 **Implementation of Peer Education Programme**

298 Findings from our study indicate that RKSK and its core interventions were put on hold or  
299 altered as efforts were diverted to COVID-19 response activities. Other countries(23) have also  
300 reported the diversion of their health systems to solely focus on COVID-19. RKSK and its core  
301 interventions aim to address adolescent health issues and if such interventions are hampered, it  
302 can affect development gains made in the past few decades(24) and negate improvements  
303 gained from previous maternal, child health, and nutrition-related national programs(25). For  
304 instance, disruption due to COVID-19 on programmes to end child marriage, coupled with the  
305 pandemic-caused economic downturn, could result in 13 million more child marriages over the  
306 next decade (2020-2030) across the globe (26).

307 Evidence from previous pandemics in sub-Saharan Africa and recent evidence from Ghana,  
308 Nigeria, and Kenya has revealed possible disparaging mid-and long-term impacts of  
309 COVID-19 on adolescents(23). Hence, in India, RKSK has a significant role to play in ensuring  
310 that developmental gains made in the area of adolescent health (in the field of nutrition  
311 (anaemia), SRH (teenage marriage, menstrual hygiene, use of contraceptives), violence  
312 (gender-based violence), etc.) are not reduced or lost.

313 *Connectivity between RKSK health workers and PEs, and between PEs and adolescents during*  
314 *COVID-19 lockdown*

315 In some instances, despite lockdown, RKSK health workers continued to provide informal  
316 support and supervision to PEs and adolescents by communicating about RKSK and COVID-  
317 19 precautions through phone calls, WhatsApp, or home visits. But there existed a digital divide  
318 in connecting with all PEs due to lack of mobile phones and/ or weak mobile networks. Some  
319 PEs maintained connections and support with adolescents in the community, either one-to-one  
320 or through video calls. At times group calls with mentors and PEs were also organised in  
321 Madhya Pradesh. These findings indicate that pre-established communication networks played  
322 a critical role in keeping adolescents, PEs, and RKSK workers connected, but also highlight

323 the existence of a digital divide in most LMICs which has been brought to the forefront due to  
324 the pandemic(27). Further, there was evidence of the vital link that PEs play between  
325 community and health workers as iterated in the programme guidelines (18).

## 326 **Impact of COVID-19 on Adolescent Health Services (AFHCs &** 327 **Helpline)**

328 Our study data suggests access to health services was affected by the pandemic resulting in the  
329 closure of AFHCs, or reduction in clinic operating days, and diversion of the health workers to  
330 other COVID-19 related duties. A study reports that ASHAs' and ANMs' involvement in  
331 COVID-19 related response activities hampered the regular benefits ensured by RKSK such as  
332 the implementation of WIFS providing supplementary nutrition and provision of sanitary  
333 napkins(22). However, our findings indicate that ASHAs and ASHA facilitators as part of  
334 WIFS and maternal and child health programmes were making house visits and were talking  
335 to adolescents regarding the PE programme. It may be said that despite the pandemic, some  
336 efforts continued to reach out to adolescents. Moreover, we need these efforts to be sustained  
337 with clear job aids so that every adolescent in a village of India irrespective of location is  
338 benefitted uniformly.

339 As per our study, Madhya Pradesh already had a 104 toll-free helpline number that was widely  
340 used by adolescents before COVID-19. The Central Government of India introduced a free  
341 helpline (08046110007) to address psycho-social concerns due to COVID-19 (28) but the same  
342 was not reported from either of the two study states, despite data collection begun a few months  
343 after the introduction of the helpline. Literature encourages greater accessibility to  
344 teleconsultations and online psychotherapy with national helplines catering to mental health  
345 needs (29). These will be helpful during both the ongoing and future pandemics, helping  
346 adolescents to remain connected with services due to physical inaccessibility. Thus, COVID-



347 19 has brought forward previously unrecognized healthcare service needs such as  
348 teleconsultations and toll-free helplines, (30).

### 349 **Repurposing of RKSK health workers and PEs to support COVID-** 350 **19 response**

351 There was a repurposing of the RKSK health workers and PEs towards COVID-19 response  
352 activities such as disseminating COVID-19 information, some instances of providing sanitary  
353 napkins, delivering essential groceries to the community, making and distributing masks,  
354 maintaining migrant and quarantine records, etc. These tasks were carried out despite  
355 challenges such as increased COVID-19 caseloads in both states, the absence of additional PE  
356 training, and no additional financial support to PEs. These are indicative of the fact that, despite  
357 the unpreparedness, the RKSK health workers and PEs were able to actively respond to the  
358 pandemic situation and provided help in whichever manner possible.

### 359 **Adolescents' health and development issues during COVID-19**

360 Our study states, the RKSK implementers interviewed perceived that there was no  
361 change/negative impact on the adolescents' mental health. This could be attributed to various  
362 factors like the informal communication of health workers with PEs and adolescents, and  
363 mental health being the most commonly discussed theme during the PE sessions pre-COVID.  
364 Hence, adolescents may have been equipped with coping skills to manage the stress and anxiety  
365 due to the pandemic. Our situational analysis began during the initial phases of the COVID-19  
366 pandemic and a truer picture would arise later due to the prolonged nature of the pandemic.  
367 However, the literature suggests COVID-19 could have a deleterious impact on the mental  
368 health of children and adolescents (31) and this may be due to a variety of reasons, varying  
369 from a low understanding of the entire situation, disruption in their regular schedule with school  
370 closures(32), problems of substance misuse, and heightened physical abuse (domestic violence,



371 intimate partner violence)(33). These topics fall under the six RKSJ themes and there is plenty  
372 of information available about the same in different resources such as the PE training manual,  
373 PE Activity Book, and Reference Book of Frequently Asked Questions (34).

374 India is already dealing with poor mental health care infrastructure and the added stress of the  
375 pandemic has overwhelmed the health care workforce with increasing pressure on the public  
376 health infrastructure(25). Studies discussed above indicate the need to focus on mental health  
377 as an upcoming health issue for both adolescent health programmes and in the larger context  
378 of public health. Therefore, PE interventions can be game-changers for the future of our  
379 country as they not only increase awareness but also encourage adolescents' engagement as  
380 being beneficial for the overall health and well-being of adolescents (35).

381 Keeping in mind the growing need for mental healthcare in India(29) it may be suggested that  
382 the PEs as health navigators may help in providing support to the health system as a low-cost  
383 intervention as part of RKSJ. Studies are indicating that in comparison to traditional health  
384 care providers, peer educators are more cost-effective and may help overcome shortages of  
385 human resources since community health workers are also overburdened(36,37).

386 Future program planning can be informed by our study findings to adopt a mix of high tech  
387 (digital platforms and tools), low tech (SMS and phone calls), as well as no-tech (community,  
388 teachers, and parents' groups) approaches to reach more adolescents including PEs in a variety  
389 of contexts(27) while also assisting in overcoming the impact of future pandemics(38).

390 Looking at the current context in India, PE sessions can inculcate the importance of physical  
391 distancing, general hygiene, and other infection control measures vital in preventing the  
392 transmission of viruses. Our study suggests that peer educators can be important stakeholders  
393 during a health disaster-related response, or a quick onset crisis, and in overworked resource-  
394 constrained health systems, especially in low-and middle-income countries like India. Hence,  
395 to keep the momentum and engagement of the PEs, there is a need to enhance the skills of PEs

396 through booster trainings, ongoing support, granting them more visibility, and incorporating  
397 their new roles and responsibilities more formally within the health system(22). The PEs could  
398 also be provided experience certificates or some remuneration in the form of stipends for their  
399 work to acknowledge their contribution and for PEs to get a sense of accomplishment. This  
400 also empowers them at the community level and makes them responsible citizens within the  
401 health system(39).

402 Despite the novel findings presented in this paper, a few study limitations are worth  
403 considering. All interviews were audio-recorded thus participants' non-verbal cues could not  
404 be captured, which could have enriched descriptions of experiences and situations in the study.  
405 Due to snowball sampling the number of participants at state, district, and village levels were  
406 not equal. Thus, there could be reporting bias by the participants due to their difference in the  
407 level of engagement with programme implementation. In context to the impact of COVID-19  
408 on adolescent health and development issues, we have captured the perspective of various  
409 stakeholders other than PEs. As indicated by the stakeholder, there was a limited impact so we  
410 did not explore these issues further by gender, socio-economic status, marital status, etc. We  
411 could not include adolescents who are part of RKSK in this study, thus the beneficiary  
412 perspective is missing. Finally, our study was limited to a few participants from two states,  
413 limiting our findings' generalizability. All the above limitations will be considered while  
414 conducting an ongoing larger study with a bigger set of participants in the same study sites.

## 415 **Conclusion**

416 Our findings indicate that there were some avenues of access to health care available to the  
417 adolescents despite the pandemic. They also highlight how RKSK health workers and PEs who  
418 were already working in the community were repurposed to engage with the COVID-19  
419 response to not only the adolescents but also their communities as a whole. PEs along with the  
420 health workers navigated this challenging time and demonstrated their resilience in the face of

421 an emergency. While their roles may have been very critical in responding to the pandemic,  
422 some additional support in the form of trainings, compensation, etc. could help strengthen this  
423 model for the future.

## 424 **Acknowledgments**

425 We would like to express our sincere gratitude to all the respondents of our study. We also  
426 acknowledge the help and support of various officials from the district, state health  
427 departments, and the Ministry of Health and Family Welfare, Government of India. We also  
428 thank Dr. David Ross for critically reviewing the manuscript being a member of the  
429 Independent Project Steering Committee formulated for the study. The corresponding author  
430 also affirms that she has listed everyone who has contributed significantly to this study.

## 431 **References**

- 432 1. OECD. Youth-and-COVID-19-Response-Recovery-and-Resilience - OECD. 2020.
- 433 2. World Health Organization & United Nations Children’s Fund (UNICEF).  
434 Community-based health care, including outreach and campaigns, in the context of the  
435 COVID-19 pandemic: interim guidance, May 2020. 2020 May.
- 436 3. Guidelines on the measures to be taken by Ministries/ Departments of Government of  
437 India, State/ Union Territory Governments and State/ Union Territory Authorities for  
438 containment of the COVID-19 Epidemic in the Country [Internet]. 2020 [cited 2020  
439 Dec 3]. Available from: [https://www.mha.gov.in/sites/default/files/Guidelines\\_0.pdf](https://www.mha.gov.in/sites/default/files/Guidelines_0.pdf)
- 440 4. MHA Order with Addendum to Guidelines Dated 24.03.2020 [Internet]. [cited 2020  
441 Dec 3]. Available from: [https://www.mha.gov.in/sites/default/files/MHA\\_order\\_with  
442 addendum to Guidelines Dated 24.3.2020\\_0.pdf](https://www.mha.gov.in/sites/default/files/MHA_order_with_addendum_to_Guidelines_Dated_24.3.2020_0.pdf)
- 443 5. Garg S, Bhatnagar N, Singh Mm, Borle A, Raina S, Kumar R, et al. Strengthening

- 444 public healthcare systems in India; Learning lessons in COVID-19 pandemic. *J Fam*  
445 *Med Prim Care*. 2020;9(12):5853.
- 446 6. Dutta SS. 600 more hospitals in India designated as Covid-19 treatment centres within  
447 four weeks- *The New Indian Express*. Indian Express. 2020;
- 448 7. Arora M. COVID-19 and Beyond: Implications for People Living with Non-  
449 Communicable Diseases in India | Center for the Advanced Study of India [Internet].  
450 CENTER FOR THE ADVANCED STUDY OF INDIA. 2020 [cited 2021 Feb 15].  
451 Available from: <https://casi.sas.upenn.edu/iit/monikaarora>
- 452 8. Ministry of Health and Family Welfare. Implementation guidelines Rashtriya Kishor  
453 Sawasthya Karyakram(RKSK). GoI. 2018.
- 454 9. National Health Mission (NHM) G. Operational framework -translating strategy into  
455 programmes. 2014BC.
- 456 10. Development R, Welfare F. Ministry of Health and Family Welfare Government of  
457 India Operational Guidelines on School Health Programme under Ayushman Bharat  
458 Health and Wellness Ambassadors partnering to build a stronger future A Joint  
459 initiative of Ministry of Health "; Family W. 2018;(April).
- 460 11. Kumar S, Kumar S. Use of cluster analysis to monitor novel coronavirus-19 infections  
461 in Maharashtra, India. *Indian J Med Sci*. 2020 Aug;72(2):44–8.
- 462 12. Rath RS, Dixit AM, Koparkar AR, Kharya P, Joshi HS. COVID-19 pandemic in India:  
463 A Comparison of pandemic pattern in Selected States. *Nepal J Epidemiol*. 2020  
464 Jun;10(2):856–64.
- 465 13. Ghosh P, Ghosh R, Chakraborty B. COVID-19 in India: Statewise Analysis and  
466 Prediction. *JMIR Public Heal Surveill* 2020;6(3)e20341

- 467 <https://publichealth.jmir.org/2020/3/e20341>. 2020 Aug;6(3):e20341.
- 468 14. KRISHNAN SANJANA, DEO SAHIL, MANURKAR SHARDUL. 50 days of  
469 lockdown: Measuring India's success in arresting COVID-19 | ORF. 2020 May.
- 470 15. Coronavirus India lockdown Day 33 updates | April 26, 2020 - The Hindu.
- 471 16. Adolescent Health Division, Ministry of Health and Family Welfare G of I. Rashtriya  
472 Swasthya Kishore Karyakram Operational Framework. 2014.
- 473 17. Mathur R. National Guidelines for Ethics Committees Reviewing Biomedical &  
474 Health Research [Internet]. Indian Council of Medical Research. 2020 [cited 2021 Apr  
475 29]. Available from:  
476 [https://www.icmr.gov.in/pdf/covid/techdoc/EC\\_Guidance\\_COVID19\\_06052020.pdf](https://www.icmr.gov.in/pdf/covid/techdoc/EC_Guidance_COVID19_06052020.pdf)
- 477 18. Adolescent Health Division M, GoI. Operational Framework, translating strategy into  
478 programmes. 2014 Jan.
- 479 19. Press Trust of India. 'My family, my responsibility' drive will make Maharashtra fit:  
480 CM. Hindustan Times [Internet]. 2020 Sep 25 [cited 2021 Apr 29]; Available from:  
481 [https://www.hindustantimes.com/india-news/my-family-my-responsibility-drive-will-](https://www.hindustantimes.com/india-news/my-family-my-responsibility-drive-will-make-maharashtra-fit-cm/story-OH3cJ1CjjT2n5MSmEv4dUM.html)  
482 [make-maharashtra-fit-cm/story-OH3cJ1CjjT2n5MSmEv4dUM.html](https://www.hindustantimes.com/india-news/my-family-my-responsibility-drive-will-make-maharashtra-fit-cm/story-OH3cJ1CjjT2n5MSmEv4dUM.html). Published  
483 September 25, 2020. Accessed January 31, 2021.
- 484 20. Poddar S, Mukherjee U. Ascending Child Sexual Abuse Statistics in India During  
485 COVID-19 Lockdown: A Darker Reality and Alarming Mental Health Concerns.  
486 *Indian J Psychol Med*. 2020 Sep;42(5):493–4.
- 487 21. Khurana Manju, Dayal Aditi. *Childline 1098 (Case Studies on E-Governance in India*  
488 *2013-14)*. Delhi;
- 489 22. Kumar Mm, Karpaga Priya P, Panigrahi S, Raj U, Pathak V. Impact of COVID-19

- 490 pandemic on adolescent health in India. *J Fam Med Prim Care*. 2020;9(11):5484.
- 491 23. Addae EA. COVID-19 pandemic and adolescent health and well-being in sub-Saharan  
492 Africa: Who cares? *Int J Health Plann Manage*. 2021 Jan;36(1):219–22.
- 493 24. Ghosh A, Nundy S, Mallick TK. How India is dealing with COVID-19 pandemic.  
494 *Sensors Int*. 2020 Jan;1:100021.
- 495 25. Gopalan HS, Misra A. COVID-19 pandemic and challenges for socio-economic issues,  
496 healthcare and National Health Programs in India. *Diabetes Metab Syndr Clin Res*  
497 *Rev*. 2020 Sep;14(5):757–9.
- 498 26. UNFPA. Impact of the COVID-19 Pandemic on Family Planning and Ending Gender-  
499 based Violence, Female Genital Mutilation and Child Marriage. Interim Technical  
500 Note. 2020.
- 501 27. C3. ISSUES FACED BY ADOLESCENTS DURING COVID19. 2020 Sep.
- 502 28. MoHFW. COVID-19 Helplines for Mental Health Assistance. 2021.
- 503 29. Banerjee D, Bhattacharya P. “Pandemonium of the pandemic”: Impact of COVID-19  
504 in India, focus on mental health. *Psychol Trauma Theory, Res Pract Policy*. 2020  
505 Sep;12(6):588.
- 506 30. Kumar A, Rajasekharan Nayar K, Koya SF. COVID-19: Challenges and its  
507 consequences for rural health care in India. *Public Heal Pract*. 2020 Nov;1:100009.
- 508 31. Dalal PK, Roy D, Choudhary P, Kar SK, Tripathi A. Emerging mental health issues  
509 during the COVID-19 pandemic: An Indian perspective. *Indian J Psychiatry*. 2020  
510 Sep;62(Suppl 3):S354.
- 511 32. Imran N, Zeshan M, Pervaiz Z. Mental health considerations for children

- 512 & adolescents in COVID-19 Pandemic: Pakistan J Med Sci. 2020 May;36(COVID19-  
513 S4):S67–72.
- 514 33. Population Foundation of India. Impact of COVID-19 on young people: Rapid  
515 assessment in three states, May 2020 (Bihar, Rajasthan and Uttar Pradesh) [Internet].  
516 2020. Available from: [https://populationfoundation.in/wp-](https://populationfoundation.in/wp-content/uploads/2020/08/Rapid-Assessment_Report_Youth_Survey_Covid.pdf)  
517 [content/uploads/2020/08/Rapid-Assessment\\_Report\\_Youth\\_Survey\\_Covid.pdf](https://populationfoundation.in/wp-content/uploads/2020/08/Rapid-Assessment_Report_Youth_Survey_Covid.pdf)
- 518 34. Peer Educator Reference Book-FAQs.
- 519 35. Efuribe C, Barre-Hemingway M, Vaghefi E, Suleiman AB. Coping With the COVID-  
520 19 Crisis: A Call for Youth Engagement and the Inclusion of Young People in Matters  
521 That Affect Their Lives. J Adolesc Heal. 2020 Jul;67(1):16–7.
- 522 36. Sikander S, Lazarus A, Bangash O, Fuhr DC, Weobong B, Krishna RN, et al. The  
523 effectiveness and cost-effectiveness of the peer-delivered Thinking Healthy  
524 Programme for perinatal depression in Pakistan and India: The SHARE study protocol  
525 for randomised controlled trials. Trials. 2015 Nov;16(1):1–14.
- 526 37. He J, Wang Y, Du Z, Liao J, He N, Hao Y. Peer education for HIV prevention among  
527 high-risk groups: A systematic review and meta-analysis. BMC Infect Dis. 2020  
528 May;20(1):1–20.
- 529 38. MUKHERJEE DEBARATI, BEHAL SHREYA, KURIAN OOMMEN C. Investing in  
530 Adolescent Health: Harnessing India’s Demographic Dividend | ORF. ORF. 2020.
- 531 39. Bernays S, Tshuma M, Willis N, Mvududu K, Chikeya A, Mufuka J, et al. Scaling up  
532 peer-led community-based differentiated support for adolescents living with HIV:  
533 keeping the needs of youth peer supporters in mind to sustain success. J Int AIDS Soc.  
534 2020 Sep;23(S5):e25570.

## 535 **Supporting Information**

536 S1 Table: An overview of respondents interviewed and themes covered
